# Supplementary material
Source: publisher figshare collection journal article supplement (https://tandf.figshare.com/ndownloader/files/22658072)
Supplement: Supplementary file 1 [file 22658072]

Supplementary table

Table S1. Genetic association results for major depressive disorder stratified by gender

| Gene | Polymorphism | | Control group  n (%) | MDD patients  n (%) | P genotypes | P alleles | OR (95%CI) |
| --- | --- | --- | --- | --- | --- | --- | --- |
| **Males** | | | | | | | |
| *FKBP4* | Rs2968909 | CC  CG  GG | 163 (61.0)  92 (34.5)  12 (4.5) | 30 (58.8)  19 (37.3)  2 (3.9) | 0.921 | 0.896 | 0.95  (0.57-1.58) |
| *STIP1* | Rs4980524 | AA  AC  CC | 103 (37.7)  126 (46.2)  44 (16.1) | 24 (54.6)  13 (29.6)  7 (15.9) | 0.079 | 0.155 | 1.45  (0.89-2.36) |
|  | Rs2236647 | CC  CT  TT | 100 (36.2)  132 (47.8)  44 (15.9) | 19 (38.0)  18 (36.0)  13 (26.0) | 0.151 | 0.440 | 0.84  (0.54-1.29) |
| *BAG1* | Rs706115 | CC  CG  GG | 186 (66.9)  77 (27.7)  15 (5.4) | 31 (60.8)  17 (33.3)  3 (5.9) | 0.689 | 0.498 | 0.81  (0.49-1.36) |
| *SRSF3* | Rs1406945 | CC  CG  GG | 114 (40.9)  126 (45.1)  39 (14.0) | 20 (39.2)  26 (51.0)  5 (9.8) | 0.634 | 0.824 | 1.05  (0.67-1.64) |
| *SRSF5* | Rs3104 | GG  AG  AA | 165 (60.7)  88 (32.4)  19 (6.9) | 34 (66.7)  14 (27.4)  3 (5.9) | 0.720 | 0.444 | 1.23  (0.72-2.09) |
| **Females** | | | | | | | |
| *FKBP4* | Rs2968909 | CC  CG  GG | 187 (69.3)  71 (26.3)  12 (4.4) | 108 (67.5)  43 (26.9)  9 (5.6) | 0.841 | 0.647 | 0.91  (0.63-1.29) |
| *STIP1* | Rs4980524 | AA  AC  CC | 103 (38.4)  126 (47.0)  39 (15.6) | 74 (51.8)  43 (30.0)  26 (18.2) | 0.004 | 0.171 | 1.23  (0.91-1.67) |
|  | Rs2236647 | CC  CT  TT | 101 (37.3)  132 (48.7)  38 (14.0) | 75 (46.9)  59 (36.9)  26 (16.2) | 0.055 | 0.156 | 1.17  (0.87-1.56) |
| *BAG1* | Rs706115 | CC  CG  GG | 168 (62.0)  91 (35.6)  12 (4.4) | 114 (70.8)  42 (26.1)  5 (3.1) | 0.174 | <0.001* | 2.63  (1.81-3.81) |
| *SRSF3* | Rs1406945 | CC  CG  GG | 123 (45.4)  126 (46.5)  22 (8.1) | 57 (38.9)  83 (52.1)  19 (12.0) | 0.111 | 0.052 | 0.74  (0.55-0.99) |
| *SRSF5* | Rs3104 | GG  AG  AA | 138 (52.5)  107 (40.7)  18 (6.8) | 63 (40.7)  69 (44.5)  23 (14.8) | 0.008 | 0.003* | 0.63  (0.46-0.85) |

* indicates significance
